# Supplementary material for: Advantages of Bayesian monitoring methods in deciding whether and when to stop a clinical trial: an example of a neonatal cooling trial
Source: Springer Nature journal article supplement (doi:10.1186/s13063-016-1480-4), 2016-07-22

Figure A1: Enrollment of neonates in the Optimizing Cooling Trial

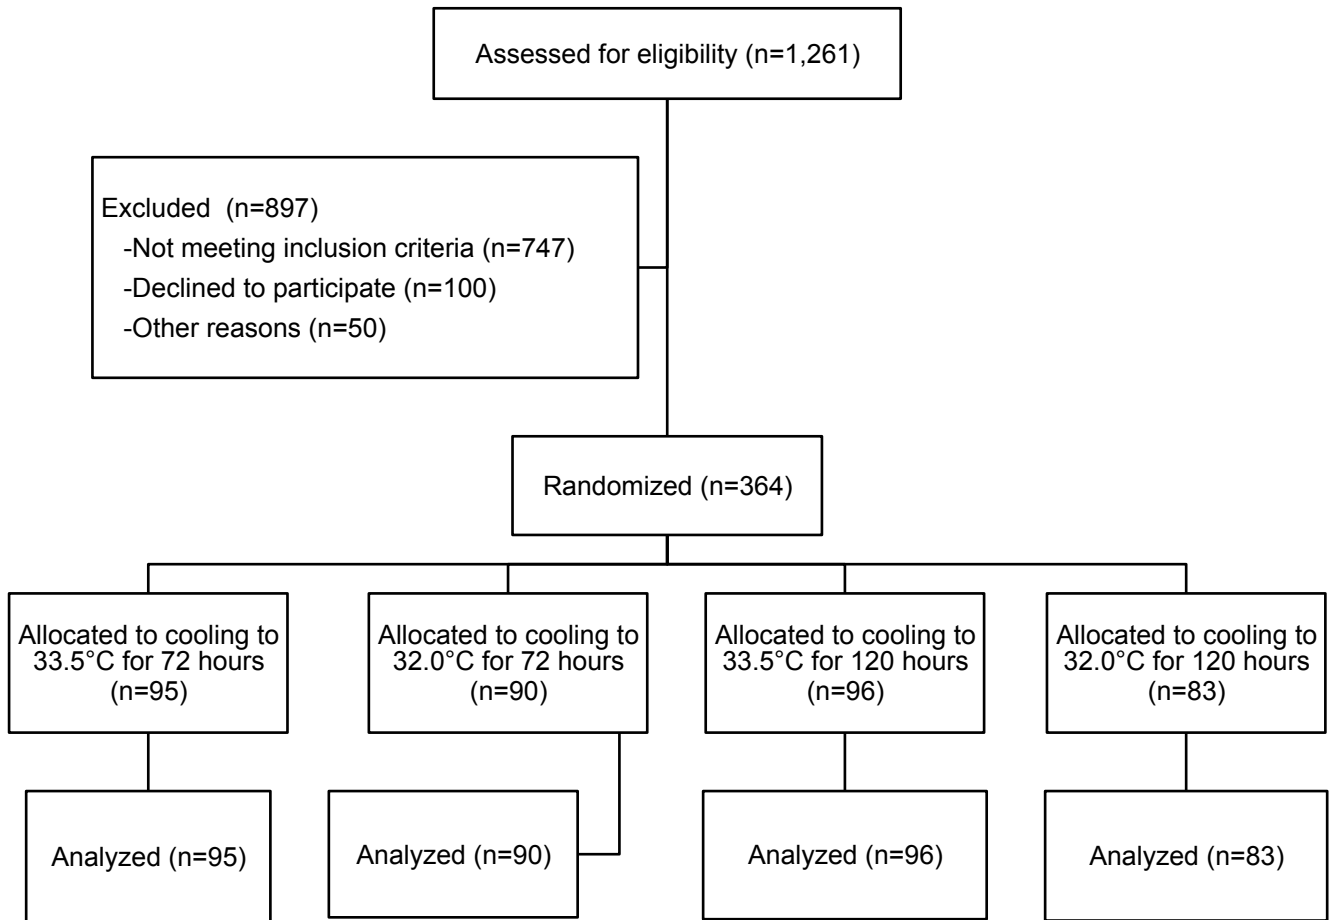

Supplement: MOESM2 [file 10514670]
