# Supplementary material for: Advantages of Bayesian monitoring methods in deciding whether and when to stop a clinical trial: an example of a neonatal cooling trial
Source: Springer Nature journal article supplement (doi:10.1186/s13063-016-1480-4), 2016-07-22
Supplement: MOESM3 [file 10514670]

## Additional File for ‘Advantages of Bayesian monitoring methods in deciding whether and when to stop a clinical trial: an example of a neonatal cooling trial’

### Results under neutral, mildly informative priors for all parameters.

We conducted a supplementary analysis using priors centered at 0 for all parameters. Specifically, we used a Normal(0, 10<sup>2</sup>) for the intercept  $\beta_0$  and the same Normal(0, 0.565<sup>2</sup>) for  $\beta_1$ ,  $\beta_2$ , and  $\beta_3$  that imply a 95% prior interval of 0.33-3.0 in the RR scale. Summaries of the posterior distributions for the 3 experimental groups compared to standard cooling are shown in Table A1.

#### Table A1. Summaries of posterior probabilities of relative risk of pre-discharge mortality.

The 3 experimental hypothermia groups are compared to standard cooling (33.5°C for 72 hours) under a neutral prior. RR values less than 1.0 favor experimental groups.

|                      | RR Posterior Median<br>(95% CrI) | Evidence of Any Benefit<br>Pr(RR < 1.0) | Futility Monitoring<br>Pr(RR < 0.90) |
|----------------------|----------------------------------|-----------------------------------------|--------------------------------------|
| 32.0°C for 72 hours  | 1.35 (0.76-2.4)                  | 15%                                     | 8%                                   |
| 33.5°C for 120 hours | 1.45 (0.82-2.6)                  | 10%                                     | 5%                                   |
| 32.0°C for 120 hours | 1.76 (0.88-3.5)                  | 6%                                      | 3%                                   |

### Sample code

Sample WinBUGS code to fit a log Binomial Bayesian model for a 2 X 2 factorial trial incorporating informative prior information for the intercept. Model 1 uses neutral priors for the intervention main effects denoted by b1 and b2. Model 2 uses enthusiastic priors for b1 and b2.

#### A1. Model 1

```
model
{
  for(i in 1:N){
    y[i]~dbin(pi[i],1)
    log(pi[i])<-b0+b1*depth[i]+b2*duration[i]+b3*depth[i]*duration[i]
  }

  #Constraints all probabilities pi[] to be less than 1.
  for (i in 1:364){
    ones[i] <- 1
    ones[i] ~ dbern(C1[i])
    C1[i] <- step(1-pi[i])
  }
}
```

```

#Priors
#Informative prior for intercept
b0~dnorm(-1.66, 3.13)

#Assumes neutral prior with credible intervals of 0.33-3.0 for RR
b1~dnorm(0, 3.13)
b2~dnorm(0, 3.13)

#Prior for interaction term assuming a very small probability
#(0.025) of a qualitative interaction
b3~dnorm(0,51) ##### SD=0.14

#Prior below was used for sensitivity analyses on the interaction
#term, assumes probability of 0.25 of a qualitative interaction
#b3~dnorm(0,6) ##### SD=0.408

##Probabilities of death in each group
p1<- exp(b0)
p2<- exp(b0+b1)
p3<- exp(b0+b2)
p4<- exp(b0+b1+b2+b3)

##Marginal probabilities of death for duration factor
pdur.72<-exp(b0+b1*mean(depth[]))
pdur.120<-exp(b0+b1*mean(depth[])+b2+b3*mean(depth[]))

##Marginal probabilities of death for depth factor
pdep.33<-exp(b0+b2*mean(duration[]))
pdep.32<-exp(b0+b1+b2*mean(duration[])+b3*mean(duration[]))

##Relative risks for marginal comparisons of duration and depth
RR.dur<-exp(b2+b3/2)
RR.dep<-exp(b1+b3/2)

##Relative risks for 3 hypothermia groups compared to standard
#cooling
RR1<-exp(b1)
RR2<-exp(b2)
RR3<-exp(b1+b2+b3)

##Risk differences for 3 hypothermia groups
RD1<-p1-p2
RD2<-p1-p3

```

```

RD3<-p1-p4

## Probability of any benefit for 3 hypothermia groups compared
#to standard
pRR1.1<-1-step(b1)
pRR2.1<-1-step(b2)
pRR3.1<-1-step(b1+b2+b3)

## Probability of RR < 0.9 for 3 hypothermia groups compared to
#standard
pRR1.90<-step(-0.1053605-b1)
pRR2.90<-step(-0.1053605-b2)
pRR3.90<-step(-0.1053605-(b1+b2+b3))

###Probability of increased mortality by 5% or more for 3
#hypothermia groups compared to standard

pRD1.INC05<-step(p2-p1-.05)
pRD2.INC05<-step(p3-p1-.05)
pRD3.INC05<-step(p4-p1-.05)

###Probability of decreased mortality by 1% or more for 3
#hypothermia groups compared to standard
pRD1.DEC01<-step(p1-p2-.01)
pRD2.DEC01<-step(p1-p3-.01)
pRD3.DEC01<-step(p1-p4-.01)

##Probabilities of any benefit and RR < 0.9 for marginal
#comparisons
pRR.dur.1<-1-step(b2+b3/2)
pRR.dur.90<-step(-0.1053605-(b2+b3/2))

pRR.dep.1<-1-step(b1+b3/2)
pRR.dep.90<-step(-0.1053605-(b1+b3/2))

##Probabilities of RD>0.01 and RD <(-0.05) for marginal
#comparisons

pRD.dur.INC05<-step(pdur.120-pdur.72-.05)
pRD.dep.INC05<-step(pdep.32-pdep.33-.05)

pRD.dur.DEC01<-step(pdur.72-pdur.120-.01)
pRD.dep.DEC01<-step(pdep.33-pdep.32-.01)

```

```

}

```

## A2. Model 2

```
model
{
  for(i in 1:N){
    y[i]~dbin(pi[i],1)
    log(pi[i])<-b0+b1*depth[i]+b2*duration[i]+b3*depth[i]*duration[i]
  }

  #Constraints all probabilities pi[] to be less than 1.
  for (i in 1:364){
    ones[i] <- 1
    ones[i] ~ dbern(C1[i])
    C1[i] <- step(1-pi[i])
  }

  #Priors
  #Informative prior for intercept
  b0~dnorm(-1.66, 3.13)

  #Enthusiastic priors with same SD as neutral priors
  b1~dnorm(-0.1625189, 3.13)
  b2~dnorm(-0.1625189, 3.13)

  b3~dnorm(0,51) ##### SD=0.14

  #Prior below was used for sensitivity analyses on the interaction
  #term
  #b3~dnorm(0,6) ##### SD=0.408

  ##Probabilities of death in each group
  p1<- exp(b0)
  p2<- exp(b0+b1)
  p3<- exp(b0+b2)
  p4<- exp(b0+b1+b2+b3)

  ##Marginal probabilities of death for duration factor
  pdur.72<-exp(b0+b1*mean(depth[]))
  pdur.120<-exp(b0+b1*mean(depth[])+b2+b3*mean(duration[]))

  ##Marginal probabilities of death for depth factor
  pdep.33<-exp(b0+b2*mean(duration[]))
  pdep.32<-exp(b0+b1+b2*mean(duration[])+b3*mean(duration[]))
}
```

```

##Relative risks for marginal comparisons of duration and depth
RR.dur<-exp(b2+b3/2)
RR.dep<-exp(b1+b3/2)

##Relative risks for 3 hypothermia groups compared to standard
#cooling
RR1<-exp(b1)
RR2<-exp(b2)
RR3<-exp(b1+b2+b3)

##Risk differences for 3 hypothermia groups
RD1<-p1-p2
RD2<-p1-p3
RD3<-p1-p4

## Probability of any benefit for 3 hypothermia groups compared
#to standard
pRR1.1<-1-step(b1)
pRR2.1<-1-step(b2)
pRR3.1<-1-step(b1+b2+b3)

## Probability of RR < 0.9 for 3 hypothermia groups compared to
#standard
pRR1.90<-step(-0.1053605-b1)
pRR2.90<-step(-0.1053605-b2)
pRR3.90<-step(-0.1053605-(b1+b2+b3))

###Probability of increased mortality by 5% or more for 3
#hypothermia groups compared to standard

pRD1.INC05<-step(p2-p1-.05)
pRD2.INC05<-step(p3-p1-.05)
pRD3.INC05<-step(p4-p1-.05)

###Probability of decreased mortality by 1% or more for 3
#hypothermia groups compared to standard
pRD1.DEC01<-step(p1-p2-.01)
pRD2.DEC01<-step(p1-p3-.01)
pRD3.DEC01<-step(p1-p4-.01)

##Probabilities of any benefit and RR < 0.9 for marginal
#comparisons
pRR.dur.1<-1-step(b2+b3/2)
pRR.dur.90<-step(-0.1053605-(b2+b3/2))

```

```
pRR.dep.1<-1-step(b1+b3/2)
pRR.dep.90<-step(-0.1053605-(b1+b3/2))

##Probabilities of RD>0.01 and RD <(-0.05) for marginal
#comparisons

pRD.dur.INC05<-step(pdur.120-pdur.72-.05)
pRD.dep.INC05<-step(pdep.32-pdep.33-.05)

pRD.dur.DEC01<-step(pdur.72-pdur.120-.01)
pRD.dep.DEC01<-step(pdep.33-pdep.32-.01)

}
```
